# Supplementary material
Source: PubMed Central journal article supplement (PMC6553512)
Supplement: adm-13-169-s008.pdf [file adm-13-169-s008.pdf]

## Seated DBP

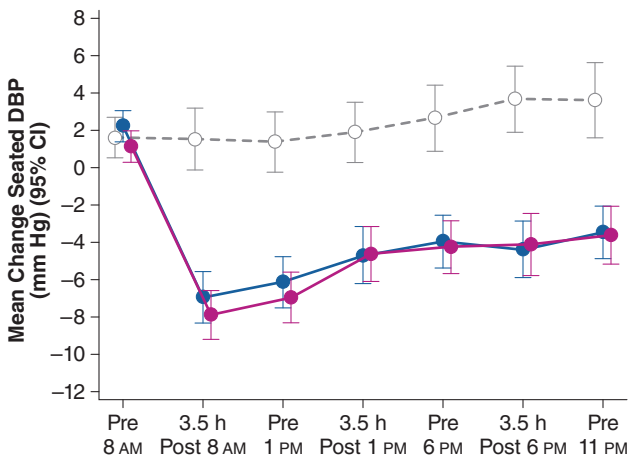

|                             | Pre 8 AM | 3.5 h Post 8 AM | Pre 1 PM | 3.5 h Post 1 PM | Pre 6 PM | 3.5 h Post 6 PM | Pre 11 PM |
|-----------------------------|----------|-----------------|----------|-----------------|----------|-----------------|-----------|
| Placebo, n = 150            | 146      | 143             | 128      | 127             | 118      | 116             |           |
| 2.16 mg Lofexidine, n = 228 | 227      | 225             | 217      | 212             | 206      | 206             |           |
| 2.88 mg Lofexidine, n = 221 | 218      | 213             | 206      | 202             | 190      | 190             |           |

## Standing DBP

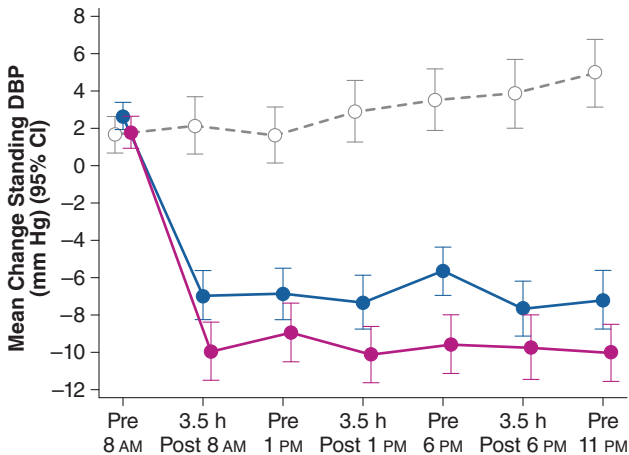

|                             | Pre 8 AM | 3.5 h Post 8 AM | Pre 1 PM | 3.5 h Post 1 PM | Pre 6 PM | 3.5 h Post 6 PM | Pre 11 PM |
|-----------------------------|----------|-----------------|----------|-----------------|----------|-----------------|-----------|
| Placebo, n = 150            | 146      | 142             | 128      | 127             | 117      | 116             |           |
| 2.16 mg Lofexidine, n = 228 | 226      | 225             | 214      | 212             | 205      | 206             |           |
| 2.88 mg Lofexidine, n = 220 | 217      | 212             | 206      | 202             | 189      | 189             |           |

--○-- Placebo     
 —●— 2.16 mg Lofexidine     
 —●— 2.88 mg Lofexidine
