# Supplementary material
Source: PubMed Central journal article supplement (PMC6553512)
Supplement: adm-13-169-s009.pdf [file adm-13-169-s009.pdf]

## Seated HR

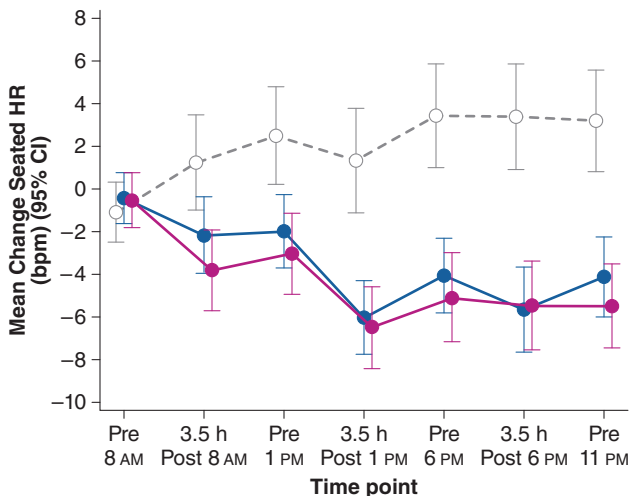

|                             |     |     |     |     |     |     |
|-----------------------------|-----|-----|-----|-----|-----|-----|
| Placebo, n = 150            | 146 | 143 | 128 | 127 | 118 | 116 |
| 2.16 mg Lofexidine, n = 227 | 226 | 224 | 216 | 211 | 205 | 205 |
| 2.88 mg Lofexidine, n = 221 | 218 | 213 | 206 | 202 | 190 | 190 |

## Standing HR

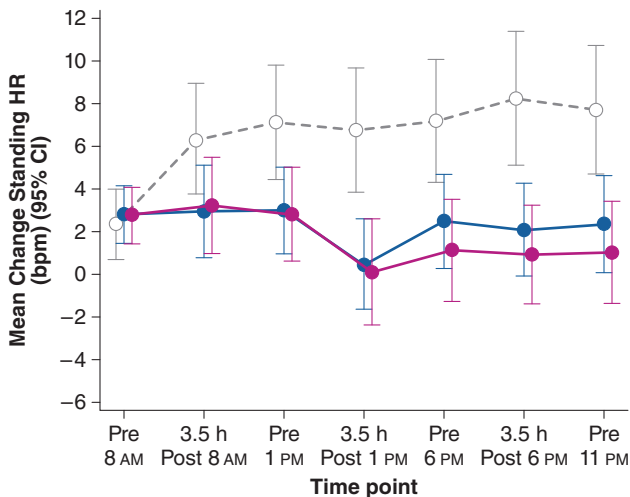

|                             |     |     |     |     |     |     |
|-----------------------------|-----|-----|-----|-----|-----|-----|
| Placebo, n = 148            | 144 | 141 | 127 | 127 | 117 | 116 |
| 2.16 mg Lofexidine, n = 225 | 224 | 223 | 212 | 209 | 203 | 205 |
| 2.88 mg Lofexidine, n = 220 | 217 | 212 | 206 | 202 | 189 | 189 |

--○-- Placebo      ● 2.16 mg Lofexidine  
 ● 2.88 mg Lofexidine
